# Supplementary material for: A study on the aromatic conjugation pathways and the ring currents of bridged [18]annulenes
Source: Royal Society of Chemistry journal article supplement (doi:10.1039/c9ra04193a), 2019-01-01
Supplement: c9ra04193a1.pdf [file c9ra04193a1.pdf]

Electronic Supplementary Information (ESI) for

**A Study on the Aromatic Conjugation Pathways and the Ring Currents of  
Bridged [18]Annulenes**

Qimangul Tohti and Ablikim Kerim

The College of Chemistry and Chemical Engineering, Xinjiang University, Urumqi 830046, China  
Email: ablikim.kerim@163.com

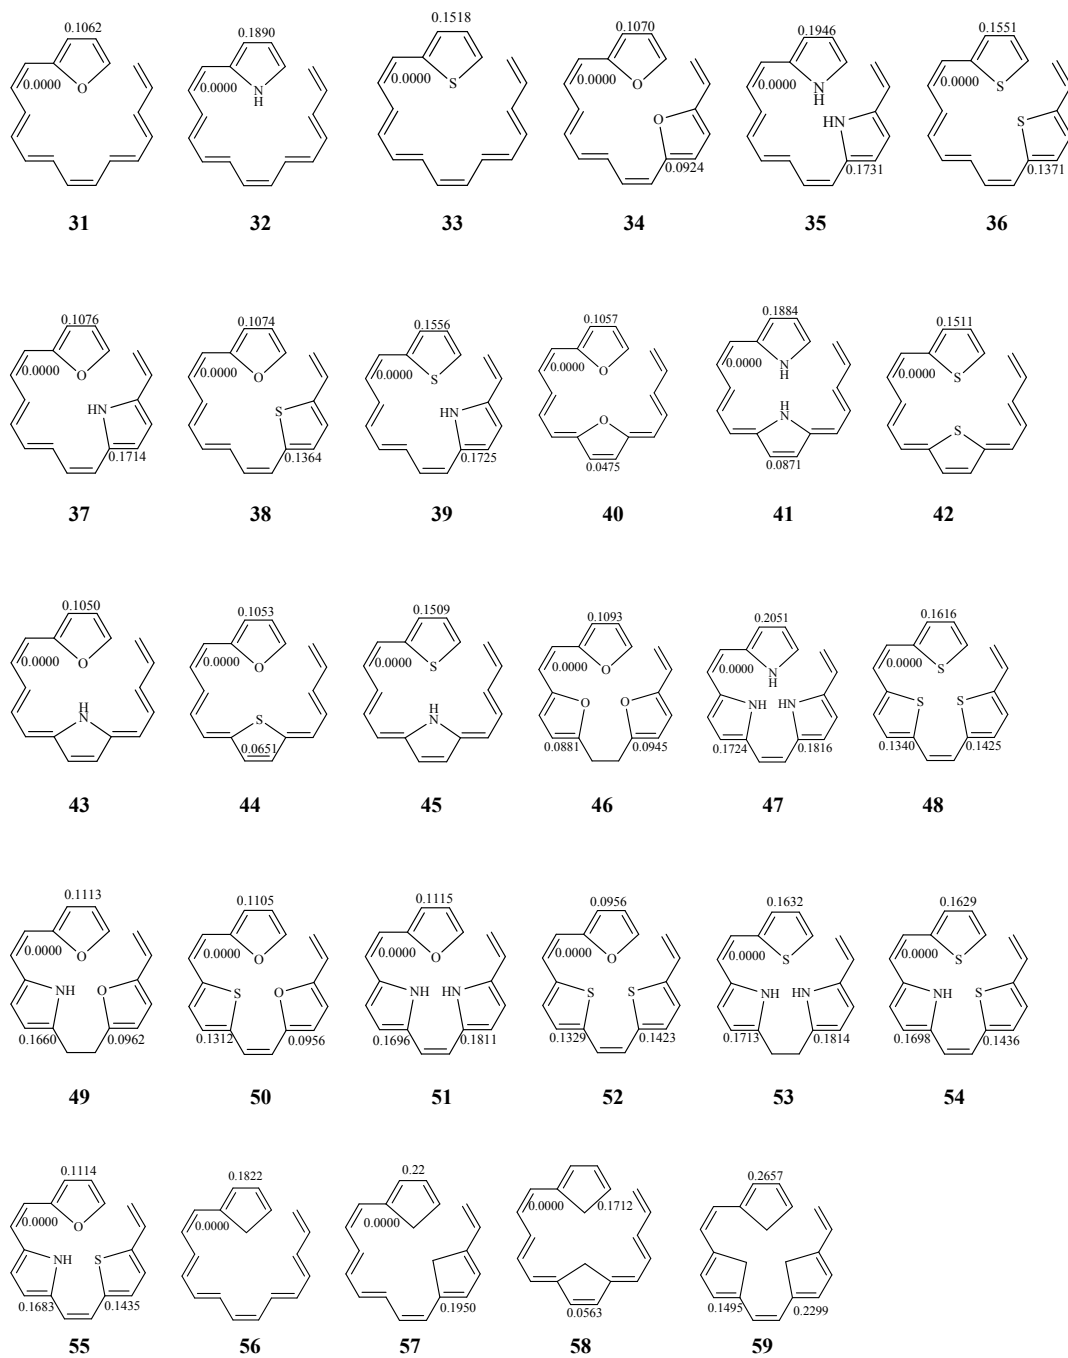

S-Fig1. Reference molecules of 2-30. BREs in units of  $|\beta|$  for all  $\pi$ -bonds.

S-Table 1. The TRE and %TRE values of compounds **31-59**.

| Species   | TRE   | %TRE  | Species   | TRE   | %TRE  |
|-----------|-------|-------|-----------|-------|-------|
| <b>31</b> | 0.106 | 0.398 | <b>46</b> | 0.289 | 0.810 |
| <b>32</b> | 0.189 | 0.736 | <b>47</b> | 0.550 | 1.694 |
| <b>33</b> | 0.152 | 0.609 | <b>48</b> | 0.431 | 1.425 |
| <b>34</b> | 0.199 | 0.639 | <b>49</b> | 0.368 | 1.065 |
| <b>35</b> | 0.367 | 1.263 | <b>50</b> | 0.333 | 0.984 |
| <b>36</b> | 0.292 | 1.057 | <b>51</b> | 0.455 | 1.358 |
| <b>37</b> | 0.278 | 0.925 | <b>52</b> | 0.380 | 1.187 |
| <b>38</b> | 0.243 | 0.828 | <b>53</b> | 0.508 | 1.600 |
| <b>39</b> | 0.328 | 1.156 | <b>54</b> | 0.468 | 1.512 |
| <b>40</b> | 0.154 | 0.494 | <b>55</b> | 0.417 | 1.271 |
| <b>41</b> | 0.281 | 0.965 | <b>56</b> | 0.182 | 0.761 |
| <b>42</b> | 0.220 | 0.796 | <b>57</b> | 0.424 | 1.662 |
| <b>43</b> | 0.193 | 0.640 | <b>58</b> | 0.278 | 1.095 |
| <b>44</b> | 0.172 | 0.585 | <b>59</b> | 0.717 | 2.662 |
| <b>45</b> | 0.241 | 0.852 |           |       |       |

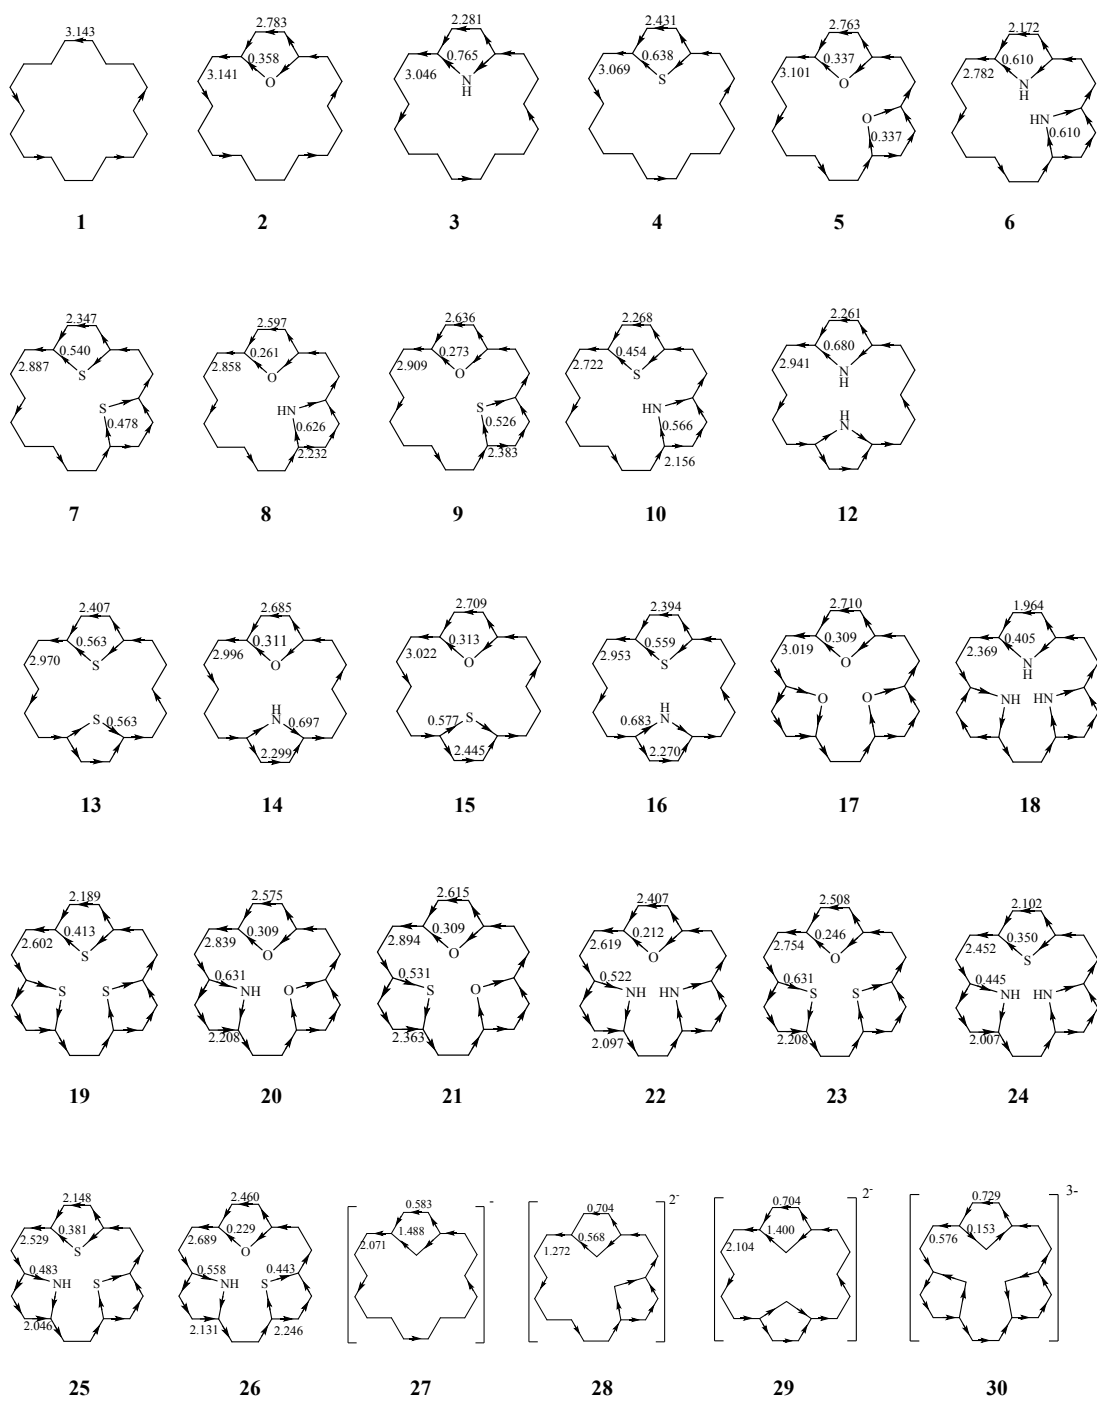

S-Fig. 2. The RCs of the remaining compounds, all in units of that for benzene ( $I_0$ )
